# Supplementary material for: γ-Glutamyltranspeptidase and pH based “AND” logic gate fluorescent probe for orthotopic breast tumor imaging
Source: Royal Society of Chemistry journal article supplement (doi:10.1039/d2cc06568a), 2023-01-01
Supplement: d2cc06568a1.pdf [file d2cc06568a1.pdf]

*Supplementary Information for*

**$\gamma$ -Glutamyltranspeptidase and pH based “AND” logic gate fluorescence probe for orthotopic breast tumor imaging**

Li-Na Zhang,<sup>a</sup> Hong Zhang,<sup>a</sup> Shan-Yong Chen\*<sup>a</sup> Yan-Zhao Liu,<sup>a</sup> Xiao-Hua Yang,<sup>a</sup> Fei-Fan Xiang,<sup>a</sup> Yan-Hong Liu,<sup>a</sup> Kun Li\*<sup>a</sup> and Xiao-Qi Yu<sup>a, b</sup>

<sup>a</sup> Key Laboratory of Green Chemistry and Technology, Ministry of Education, College of Chemistry, Sichuan University, Chengdu, 610064, China.

<sup>b</sup> Asymmetric Synthesis and Chiral Technology Key Laboratory of Sichuan Province, Department of Chemistry, Xihua University, Chengdu 610039, China.

E-mail: chensy@scu.edu.cn; kli@scu.edu.cn

## Contents

|                                                                        |    |
|------------------------------------------------------------------------|----|
| 1. Synthesis of Si-NH <sub>2</sub> -Glu.....                           | 5  |
| 2. Mechanism investigation .....                                       | 6  |
| 3. Spectrum .....                                                      | 7  |
| 4. Limit of detection (LOD).....                                       | 8  |
| 5. Selectivity of Si-NH <sub>2</sub> -Glu.....                         | 9  |
| 6. Cell viability.....                                                 | 9  |
| 7. GGT inhibition experiment.....                                      | 10 |
| 8. Co-localization experiment.....                                     | 10 |
| 9. 3D 4T-1 cell imaging.....                                           | 10 |
| 10. Establishment Mouse Tumor Model.....                               | 11 |
| 11. Fluorescence imaging of orthotopic breast tumor mouse models ..... | 11 |
| 12. Hematoxylin-eosin (HE) staining for organs and tumor.....          | 11 |
| 13. NMR Data.....                                                      | 13 |
| 14. ESI-MS Data.....                                                   | 17 |

## 1. Synthesis of Si-NH<sub>2</sub>-Glu

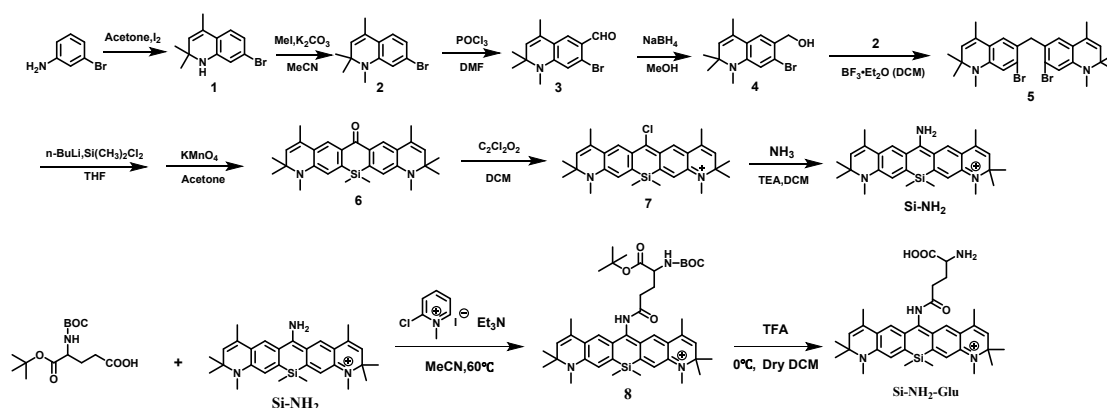

Scheme S1. Synthesis of Si-NH<sub>2</sub>-Glu

Intermediates **1** to **5** were synthesized according to literature procedures.<sup>1</sup>

### Synthesis of **6**

To a 50 mL well-dried two necked bottle flushed with argon, compound **5** (970 mg, 1.79 mmol) and dry THF (20 mL) were added. The solution was cooled to -78 °C, *n*-BuLi (2.5 M in *n*-hexane, 1.50 mL, 3.94 mmol) was added and the reaction mixture was stirred at -78 °C for 2h. Dichlorodimethylsilane (0.24 mL, 1.97 mmol) was added dropwise at -78 °C for 30 min and the reaction mixture was slowly warmed to room temperature. After stirred overnight, the mixture was extracted with DCM and concentrated under vacuum. The solid was dissolved in acetone, stirred at -5 °C for 10 min, then Potassium permanganate (848 mg, 5.37 mmol) was slowly added to the solution. After stirred at room temperature for 4h, the solution was treated with Celite to remove Manganese dioxide then concentrated under vacuum. The residue was purified by column chromatography on silica gel (DCM: MeOH) to afford compound **6** (245 mg, 30%). <sup>1</sup>H NMR (400 MHz, CDCl<sub>3</sub>) δ 8.18 (s, 2H), 6.56 (s, 2H), 5.32 (s, 2H), 2.94 (s, 6H), 2.07 (s, 6H), 1.37 (s, 12H), 0.45 (s, 6H). <sup>13</sup>C NMR (100 MHz, CDCl<sub>3</sub>) δ 185.3, 146.9, 140.8, 129.9, 129.8, 128.2, 124.9, 123.4, 112.5, 57.3, 31.2, 28.8, 18.9, -0.9.

### Synthesis of **7**

The compound **6** (183 mg, 0.4 mmol) was dissolved in dry DCM and the Oxalyl chloride (0.34 mL, 4.0 mmol) was dripped into the solution, then stirred at 45 °C for 1h. After concentrated under vacuum, the crude product was used in the next step without further purification.

### Synthesis of **8**

To a 50 mL well-dried flask, Boc-L-glutamic acid 1-tert-butyl ester (30 mg, 0.09853 mmol), Triethylamine (0.15 mL), 2-Chloro-1-methylpyridinium iodide (25.17 mg, 0.09853 mmol) and acetonitrile (20 mL) were added then stirred at room temperature for 30 min. The Si-NH<sub>2</sub> was added to the mixture and stirred at 60 °C overnight. The residue, concentrated under vacuum, was purified by column chromatography on silica gel (DCM: MeOH) to afford compound **8** (66.7 mg, 76%). <sup>1</sup>H NMR (400 MHz, CDCl<sub>3</sub>) δ 7.65 (s, 2H), 6.57 (s, 2H), 5.29 (s, 2H), 5.09 (d, *J* = 8.2 Hz, 1H), 4.09 – 4.01 (m, 1H), 2.89 (s, 6H), 2.34 (ddd, *J* = 21.0, 10.8, 5.4 Hz, 2H), 1.97 (s, 6H), 1.37 (s, 9H), 1.34 (s, 12H), 1.33 (s, 9H), 0.44 (s, 6H). <sup>13</sup>C NMR (100 MHz, CDCl<sub>3</sub>) δ 173.9, 171.3, 156.8, 152.0,

150.8, 132.2, 129.6, 127.3, 126.5, 124.4, 120.8, 61.7, 53.1, 33.3, 32.5, 29.1, 27.0, 18.4, -1.3.

### Synthesis of compound Si-NH<sub>2</sub>

Compound 7 (0.4 mmol) and Triethylamine (1 mL) were dissolved in dry DCM, and NH<sub>3</sub> (in dioxane, 0.4M, 11 mL) was added. The product, concentrated under vacuum, was pure enough to be used directly in the next step. <sup>1</sup>H NMR (400 MHz, CDCl<sub>3</sub>) δ 8.00 (s, 2H), 6.58 (s, 2H), 5.32 (s, 2H), 2.95 (s, 6H), 2.17 (s, 6H), 1.39 (s, 12H), 0.41 (s, 6H). <sup>13</sup>C NMR (100 MHz, CDCl<sub>3</sub>) δ 168.2, 148.3, 142.5, 130.1, 127.9, 124.1, 123.8, 121.4, 113.8, 58.1, 31.4, 29.2, 19.4, -1.4. ESI (+)-HRMS (m/z): [M]<sup>+</sup>calcd. for: 456.2830, found: 456.2829

### Synthesis of compound Si-NH<sub>2</sub>-Glu

Compound 8 (20 mg) was dissolved in dry DCM (1.5 mL), then trifluoroacetic acid (0.1 mL) was dripped into the solution and stirred at 0 °C overnight. The mixture was concentrated under vacuum to get the pure product **Si-NH<sub>2</sub>-Glu**. <sup>1</sup>H NMR (400 MHz, CD<sub>3</sub>OD) δ 7.55 (s, 2H), 7.14 (s, 2H), 5.63 (s, 2H), 4.12 (t, *J* = 6.7 Hz, 1H), 3.29 (s, 6H), 2.99 (t, *J* = 7.3 Hz, 2H), 2.34 (q, *J* = 7.1 Hz, 2H), 2.03 (s, 6H), 1.52 (s, 12H), 0.55 (s, 6H). <sup>13</sup>C NMR (100 MHz, CD<sub>3</sub>OD) δ 174.5, 171.3, 156.8, 152.0, 150.8, 132.2, 129.6, 127.3, 126.5, 124.4, 120.8, 61.7, 53.6, 33.3, 32.5, 29.1, 27.0, 18.4, -1.3. ESI (+)-HRMS (m/z): [M]<sup>+</sup>calcd. for: 585.3255, found: 585.3260

## 2. Mechanism investigation

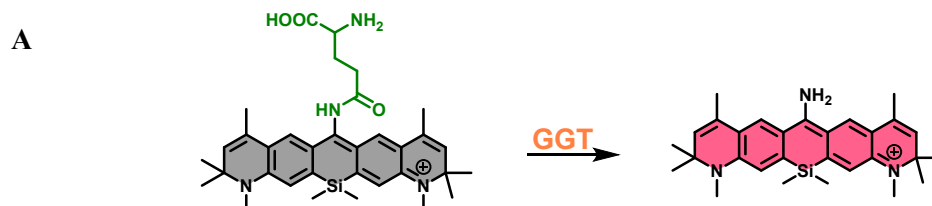

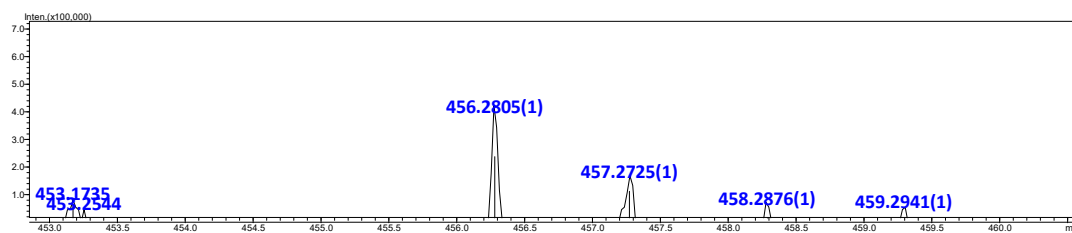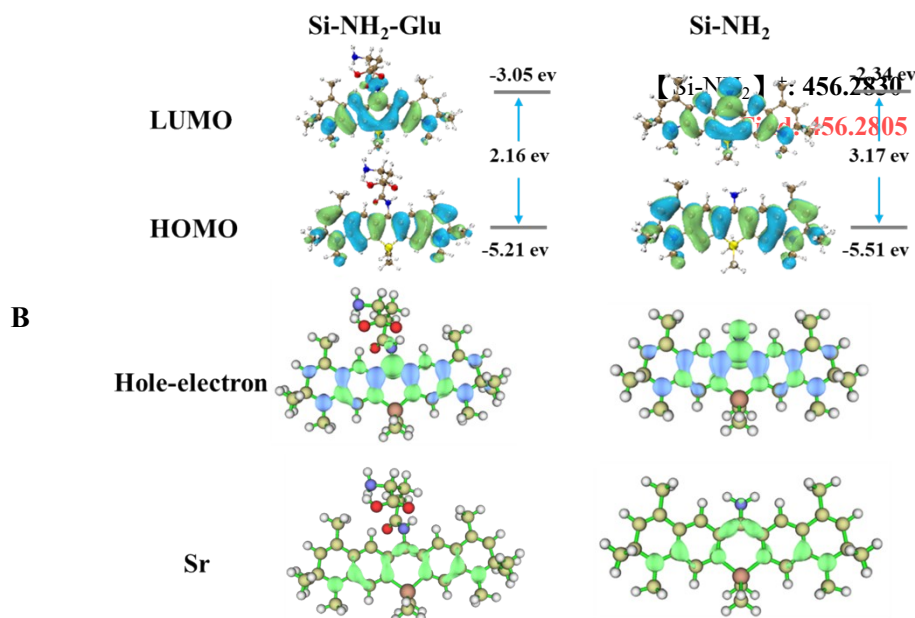

ESI+ **C**

|                         | D index        | Sr         | EDI  |
|-------------------------|----------------|------------|------|
| Si-NH <sub>2</sub> -Glu | 0.225 Angstrom | 0.678 a.u. | 7.48 |
| Si-NH <sub>2</sub>      | 0.578 Angstrom | 0.616 a.u. | 8.40 |

D index: The distance between the hole and the electron's center of mass

Sr: The function of the overlap between electron and hole distributions. The larger the index is, the higher the overlap degree of hole and electron is. The smaller the value, the more significant the hole and electron separation.

EDI (electron delocalization index): The smaller the value, the higher the degree of electron delocalization, that is, the more uniform the distribution<sup>2, 3</sup>

$$D \text{ index} = \sqrt{(X_{ele} - X_{hole})^2 + (Y_{ele} - Y_{hole})^2 + (Z_{ele} - Z_{hole})^2}$$

$$Sr \text{ index} = \sqrt{\rho^{hole}(r)\rho^{ele}(r)dr}$$

$$EDI = 100 \times \sqrt{\int [\rho^{ele}(r)]^2 dr}$$

**Figure S1.** (A) Mass spectra of **Si-NH<sub>2</sub>-Glu** with GGT, (B) The HOMO/LUOM orbits, the hole-electron overlap and Sr function acquired by optimizing ground-state and excited-state geometries at the B3LYP/6-31G\*\* and CAM-B3LYP/6-31G(d) TD levels, respectively. (C) the summarizing of relevant parameter.

### 3. Spectrum

**Figure S2.** (A) Normalized absorption spectra of Si-NH<sub>2</sub>-Glu (10 μM) and Si-NH<sub>2</sub>-Glu (10 μM) reacting with GGT (1.5 U/mL) in PBS (pH 7.4). (B) Absorbance spectra of Si-NH<sub>2</sub>-Glu (10 μM) after incubating with GGT (0 - 2 U/mL) for 2h. (C/D) Absorbance (744 nm/515 nm) values dependent on GGT concentration. All experiments were conducted in PBS, pH 7.4, at 37 °C.

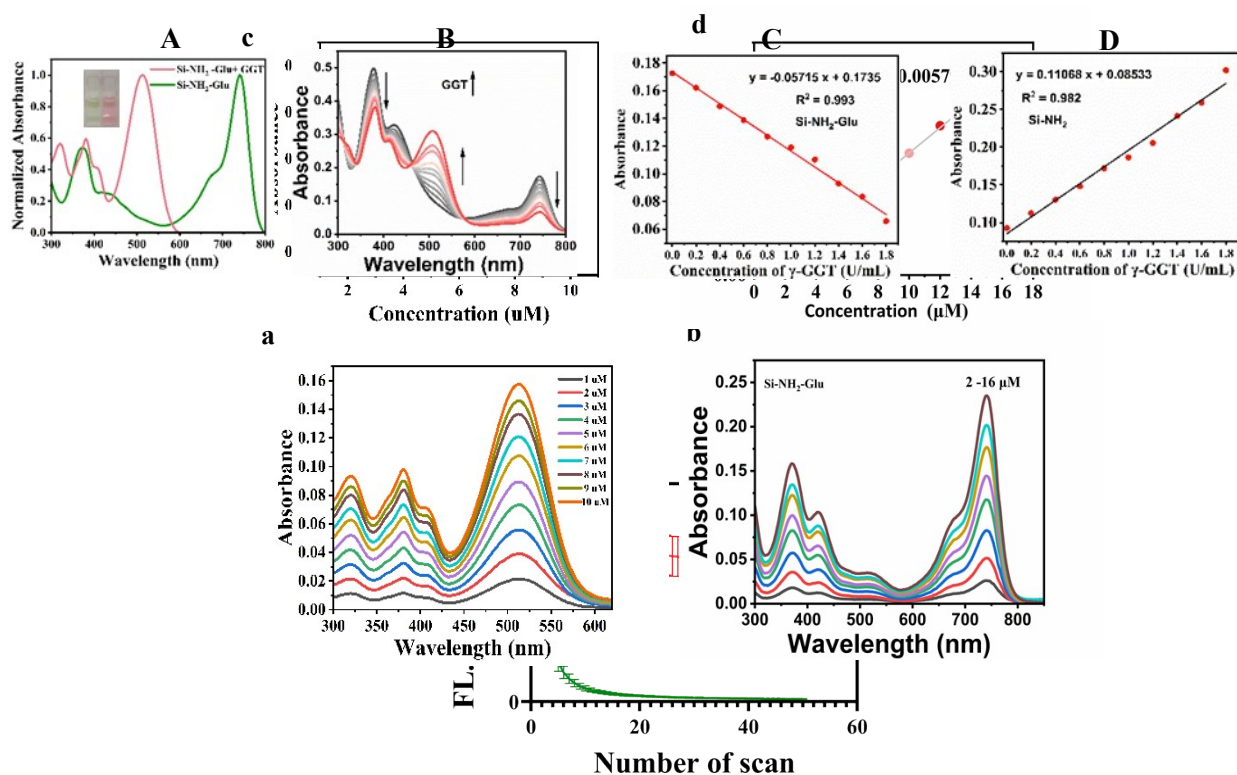

**Figure S3.** (a/b) UV spectra of Si-NH<sub>2</sub> / Si-NH<sub>2</sub>-Glu at different concentrations in PBS. (c/d) Absorption-concentration curve of Si-NH<sub>2</sub> / Si-NH<sub>2</sub>-Glu in PBS.

**Figure S4.** Fluorescence intensities of Si-NH<sub>2</sub> (2 μM) and Lysotracker Green (2 μM) in 4T-1 cells continuously irradiated by 100% laser of 543 nm and 488 nm respectively. Green channel:  $\lambda_{ex} = 488$  nm,  $\lambda_{em} = 521$  nm. Red channel:  $\lambda_{ex} = 543$  nm,  $\lambda_{em} = 654$  nm

|                         | $\lambda_{ab}$<br>(nm) | $\lambda_{em}$<br>(nm) | $\epsilon$ (M <sup>-1</sup> cm <sup>-1</sup> ) | $\Phi$ (%) |       |               |               |               |
|-------------------------|------------------------|------------------------|------------------------------------------------|------------|-------|---------------|---------------|---------------|
|                         |                        |                        |                                                | MeOH       | DMSO  | PBS<br>pH 7.4 | PBS<br>pH 3.0 | PBS<br>pH 9.0 |
| Si-NH <sub>2</sub> -Glu | 744                    | 774                    | $1.5 \times 10^4$                              | 4.8        | 10.66 | 2.17          | 2.35          | < 0.01        |
| Si-NH <sub>2</sub>      | 515                    | 654                    | $2.6 \times 10^4$                              | 52.53      | 72.7  | 23.4          | 12.4          | 5.4           |

Table 1. Photophysical properties of Si-NH<sub>2</sub>-Glu and Si-NH<sub>2</sub>.

### 4. Limit of detection (LOD)

Limit of Detection (LOD) =  $3 \times S.D./m$

$$= 3 \times 0.10176 / 5.93901$$

$$= 0.0514 \text{ U/mL}$$

S.D.: the standard deviation of blank measurements,  $n = 13$ ,  
 m: the slope of the linear equation

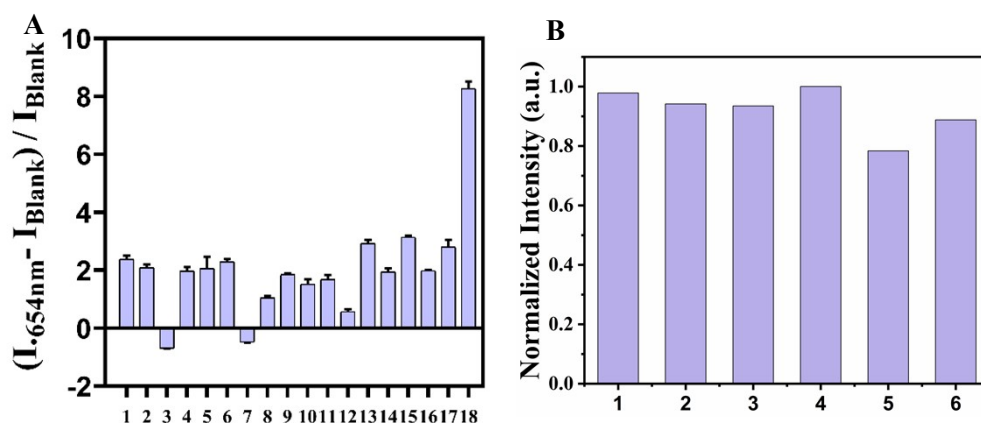

## 5. Selectivity of Si-NH<sub>2</sub>-Glu

**Figure S5.** (A) Fluorescence response of Si-NH<sub>2</sub>-Glu (10  $\mu\text{M}$  in PBS) to various analytes, and the solution was incubated for 4 h. 1: blank, 2-6:  $\text{Ca}^{2+}$ ,  $\text{Cu}^{2+}$ ,  $\text{Fe}^{2+}$ ,  $\text{Mg}^{2+}$ ,  $\text{Zn}^{2+}$  (100  $\mu\text{M}$ ), 7-11:  $^1\text{O}_2$ ,  $\text{ClO}^-$ ,  $\text{H}_2\text{O}_2$ ,  $\cdot\text{OH}$ ,  $\text{ONOO}^-$  (100  $\mu\text{M}$ ), 12: GSH (1.0 mM), 13: Hcy (100  $\mu\text{M}$ ), 14-17:  $\beta$ -Gal, MAO-A, NQO1, NTR (1  $\mu\text{g}/\text{mL}$ ), 18:  $\gamma$ -GGT (0.1 U/mL). (B) Normalized fluorescence intensity (at 654 nm) of 10  $\mu\text{M}$  Si-NH<sub>2</sub>-Glu in phosphate buffer solution (50 mM, pH 7.4) to diverse other enzymes. 1, GGT (0.5 U/mL); 2. GGT + MAO-A (0.5 U/mL, 1  $\mu\text{g}/\text{mL}$ ); 3. GGT + NTR (0.5 U/mL, 1  $\mu\text{g}/\text{mL}$ ); 4. GGT + CTSB (0.5 U/mL, 1  $\mu\text{g}/\text{mL}$ ); 5. GGT + AChE (0.5 U/mL, 50 U/mL).  $\lambda_{\text{ex/em}} = 515/654$  nm.

## 6. Cell viability

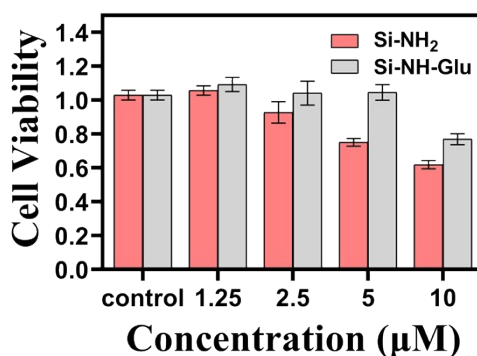

**Figure S6.** Cellular toxicity assay for Si-NH<sub>2</sub>-Glu and Si-NH<sub>2</sub> (1.25-10  $\mu\text{M}$ , 24 h), conducted using CCK-8 (Cell Counting Kit-8) toward 4T-1 cell line.

## 7. GGT inhibition experiment

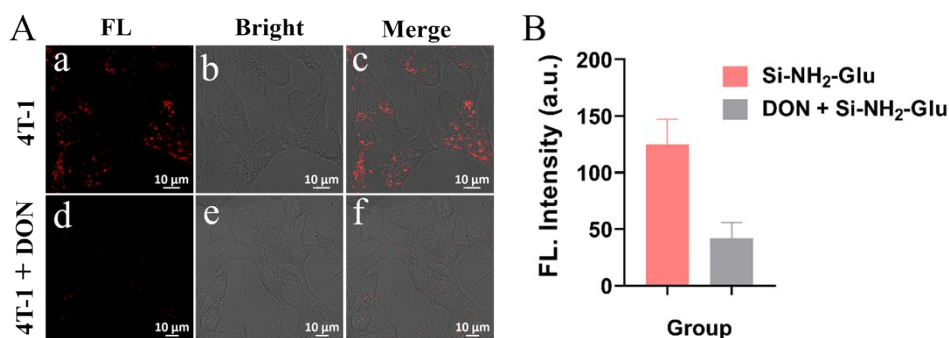

**Figure S7.** (A) 4T-1 cells treated with  $\text{Si-NH}_2\text{-Glu}$  ( $2 \mu\text{M}$ ) for 30 min (a-c). 4T-1 cells pre-treated with a GGT inhibitor (DON, 1 mM) for 60 min (d-f), and then loaded with  $\text{Si-NH}_2\text{-Glu}$  ( $2 \mu\text{M}$ ) for 30 min at  $37^\circ\text{C}$ . (B) Fluorescence intensity of (a) and (d). Scale bars,  $10 \mu\text{m}$ .  $\lambda_{\text{ex}} = 543 \text{ nm}$ ,  $\lambda_{\text{em}} = 600\text{--}700 \text{ nm}$ .

## 8. Co-localization experiment

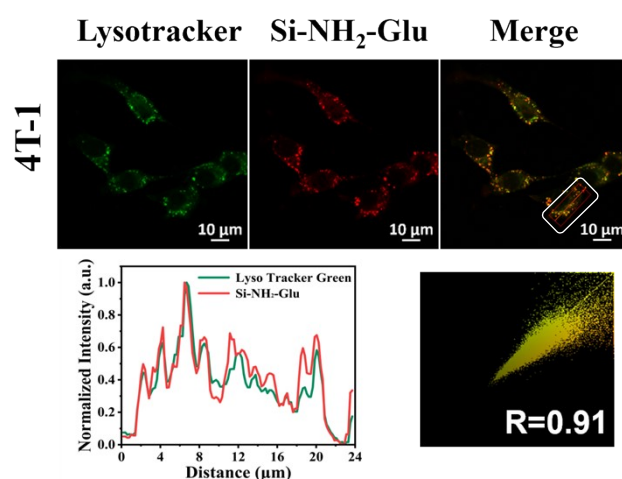

**Figure S8.** Confocal laser scanning microscopic images of 4T-1 cells treated with  $2 \mu\text{M}$   $\text{Si-NH}_2\text{-Glu}$  and  $1 \mu\text{M}$  Lysotracker Green for 30 min, at  $37^\circ\text{C}$ . Green channel:  $\lambda_{\text{ex}} = 488 \text{ nm}$ ,  $\lambda_{\text{em}} = 490\text{--}530 \text{ nm}$ . Red channel:  $\lambda_{\text{ex}} = 543 \text{ nm}$ ,  $\lambda_{\text{em}} = 600\text{--}700 \text{ nm}$ . Scale bar:  $10 \mu\text{m}$ .

## 9. 3D 4T-1 cell imaging

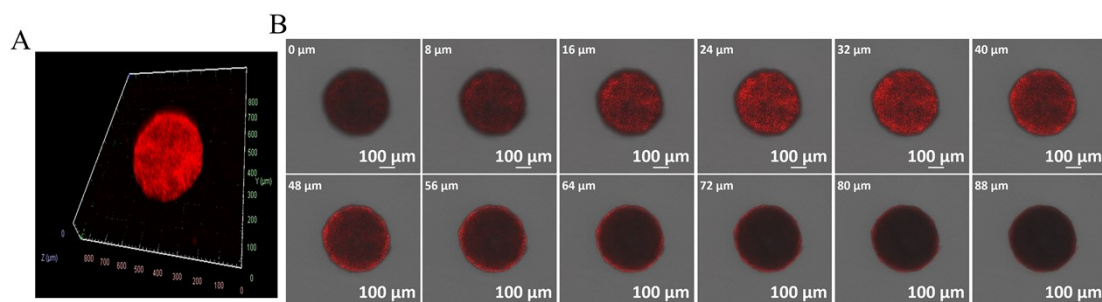



**Figure S9.** (A) Z-scan images of whole 3D tumor spheroids incubated with **Si-NH<sub>2</sub>-Glu** (5  $\mu$ M) for 12 h at 37°C. (B) Z-scan images of every 4  $\mu$ m section from top to bottom. The image in figure (A) and (B) was taken using a 10 $\times$  objective lens.  $\lambda_{\text{ex}} = 543$  nm,  $\lambda_{\text{em}} = 600\text{--}700$  nm. Scale bar=100  $\mu$ m.

## 10. Establishment Mouse Tumor Model

15-20g Balb/c mice aged 4-6 weeks were purchased from Chengdu Senwell Experimental Company (Chengdu, China). 100  $\mu$ L of 4T-1 cell suspension ( $1 \times 10^6$  cells) were subcutaneous injected into each mouse to establish the tumor models. <sup>4</sup> The animal experiments were carried out according to the protocol approved by the Ministry of Health in the People's Republic of PR China and were approved by Ethical Committees of West China School of Stomatology, Sichuan University (KS2022234).

## 11. Fluorescence imaging of orthotopic breast tumor mouse models

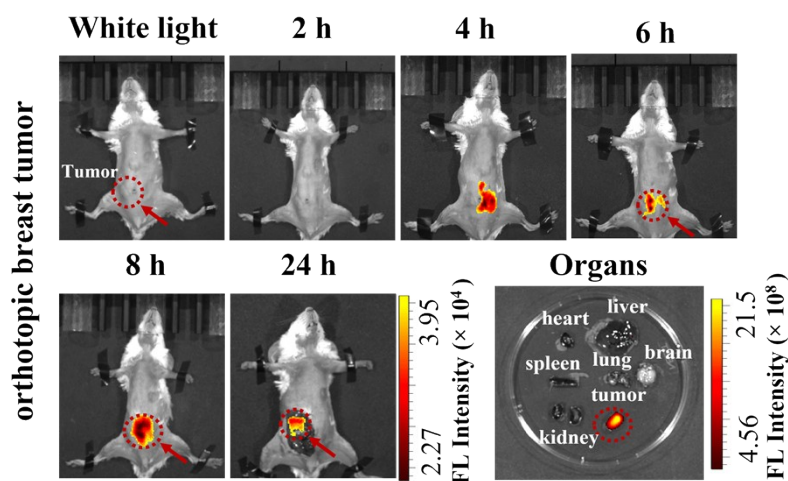

**Figure S10.** Fluorescence imaging of orthotopic breast tumor mouse models. Representative white light and fluorescence images of the mouse after being given an intravenous injection of 100  $\mu$ M **Si-NH<sub>2</sub>-Glu** in 100  $\mu$ L saline solution. The separated organs and tumor from sacrificed orthotopic tumor mouse model.

## 12. Hematoxylin-eosin (HE) staining for organs and tumor

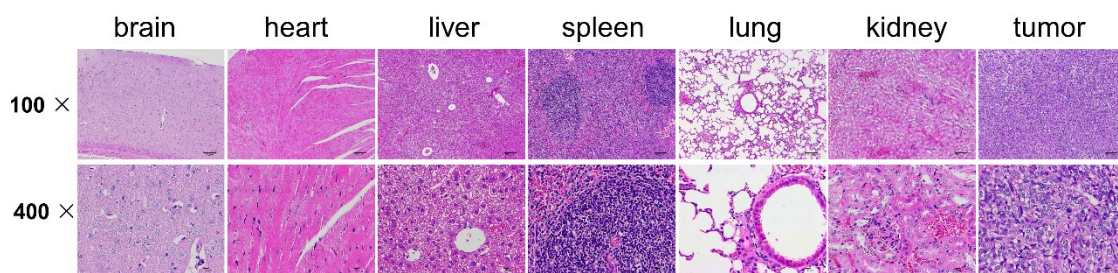

**Figure S11.** In the organ tissue sections of mice, the nuclei are clearly visible; the cytoplasm and nuclei are in sharp contrast; and there is no obvious change in the tissue morphology, which proves that the probe has good biocompatibility. A small amount of tumor cell necrosis was seen in the tumor tissue; and the necrotic area accounted for less than 5% of the total tumor tissue area. In the tumor growth area, the tumor cells are arranged irregularly; the cytoplasm of the tumor cells is abundant; the nucleus has atypia; and pathological mitoses can be seen.

### 13. NMR Data

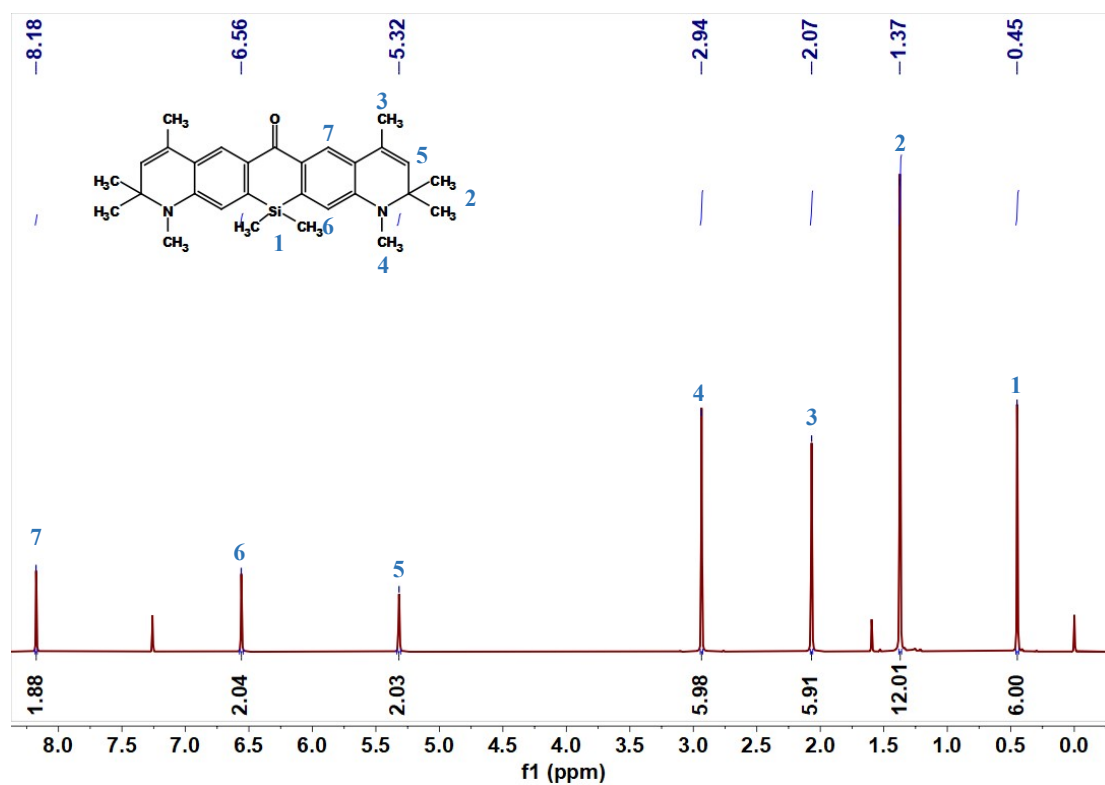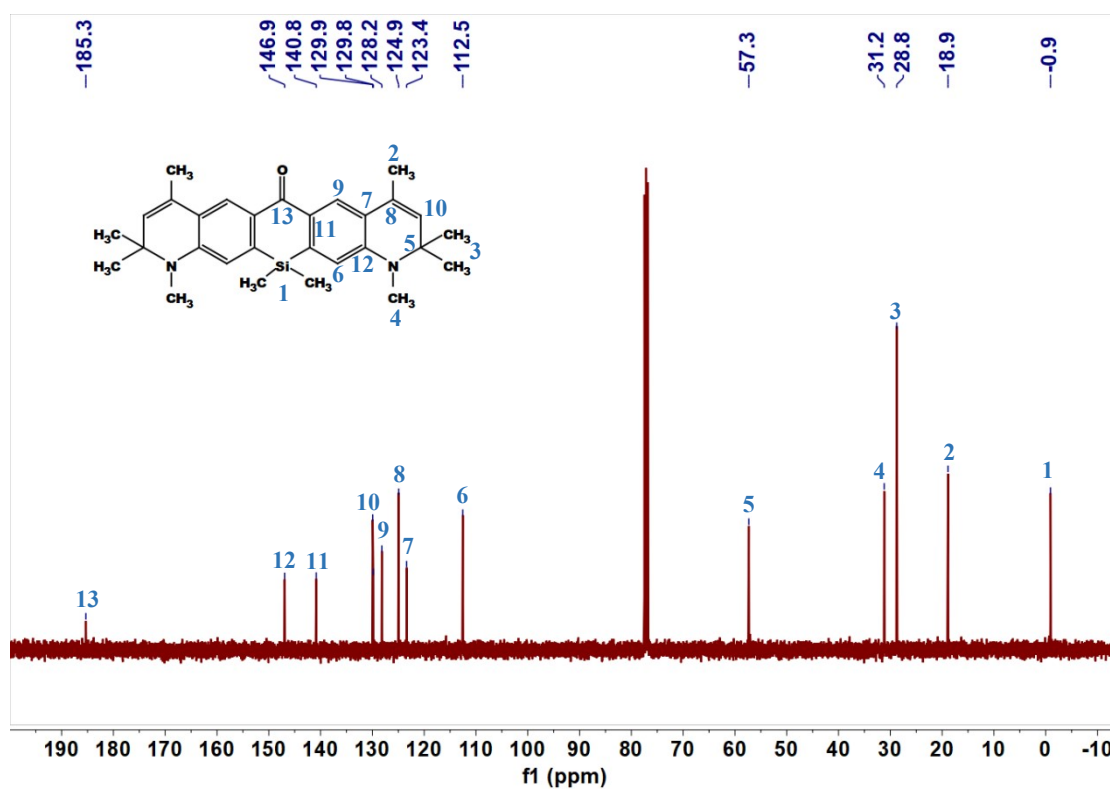

<sup>1</sup>H NMR of Compound 6 in CDCl<sub>3</sub>

<sup>13</sup>C NMR of Compound 6 in CDCl<sub>3</sub>

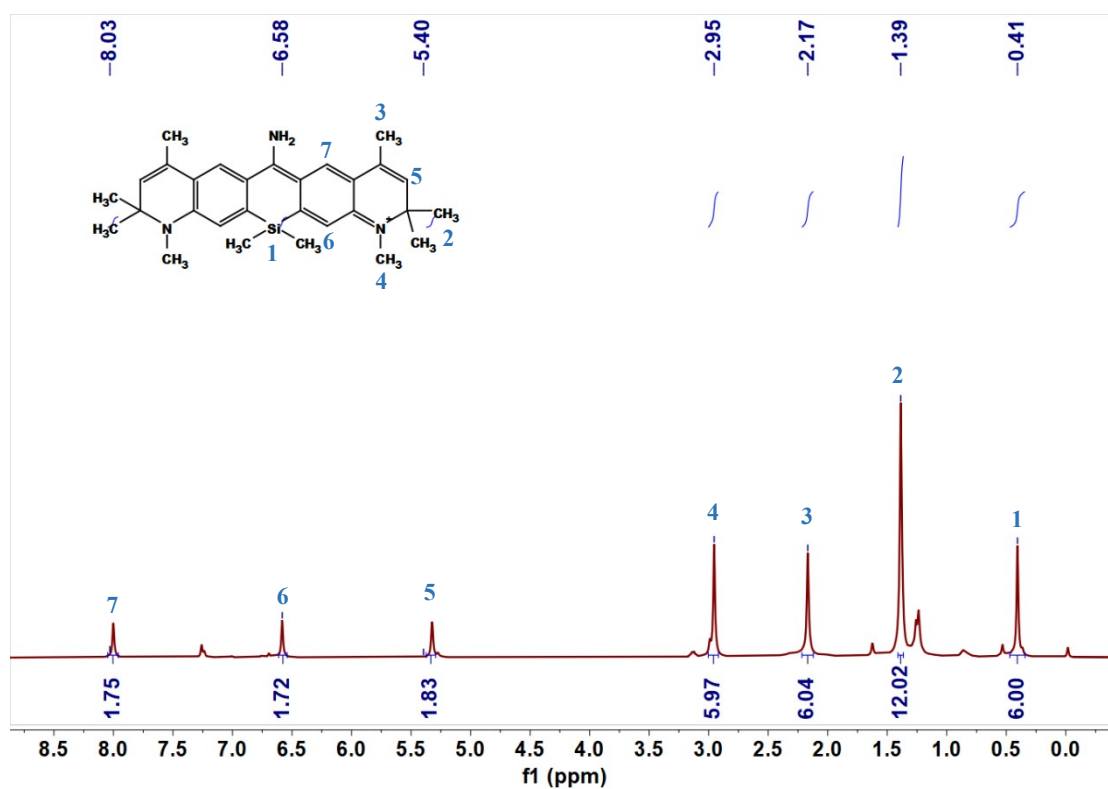

<sup>1</sup>H NMR of Si-NH<sub>2</sub> in CDCl<sub>3</sub>

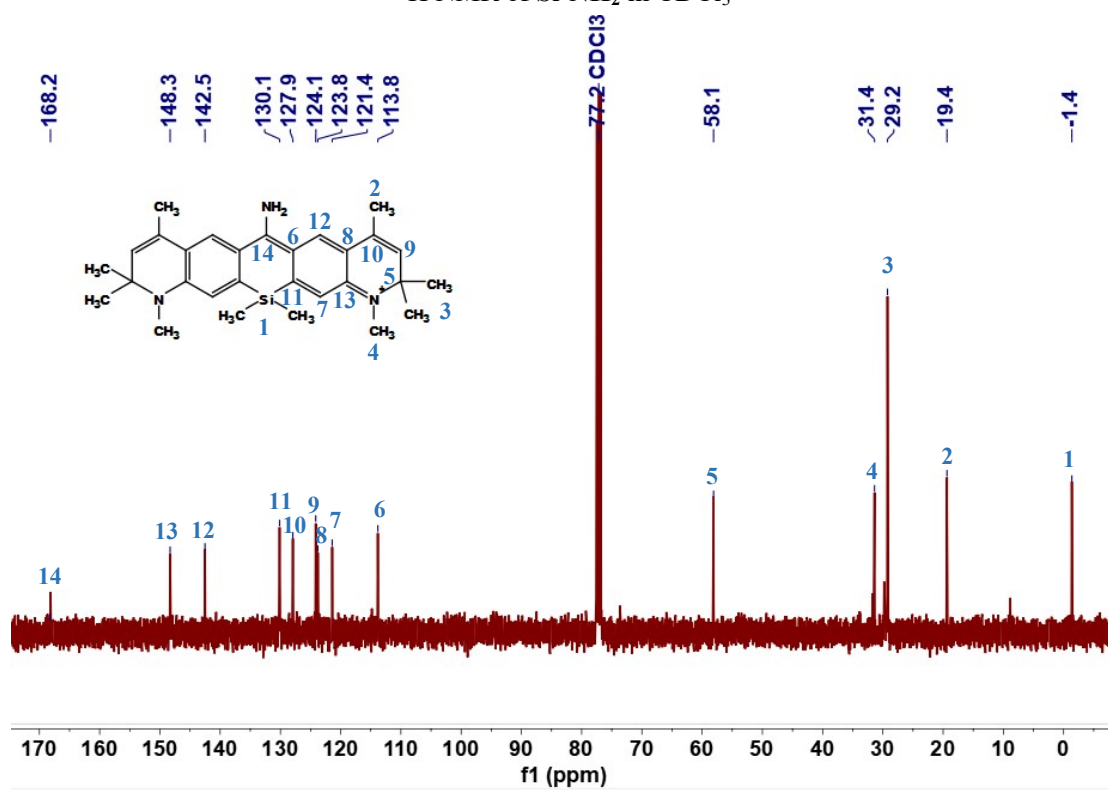

<sup>13</sup>C NMR of Si-NH<sub>2</sub> in CDCl<sub>3</sub>

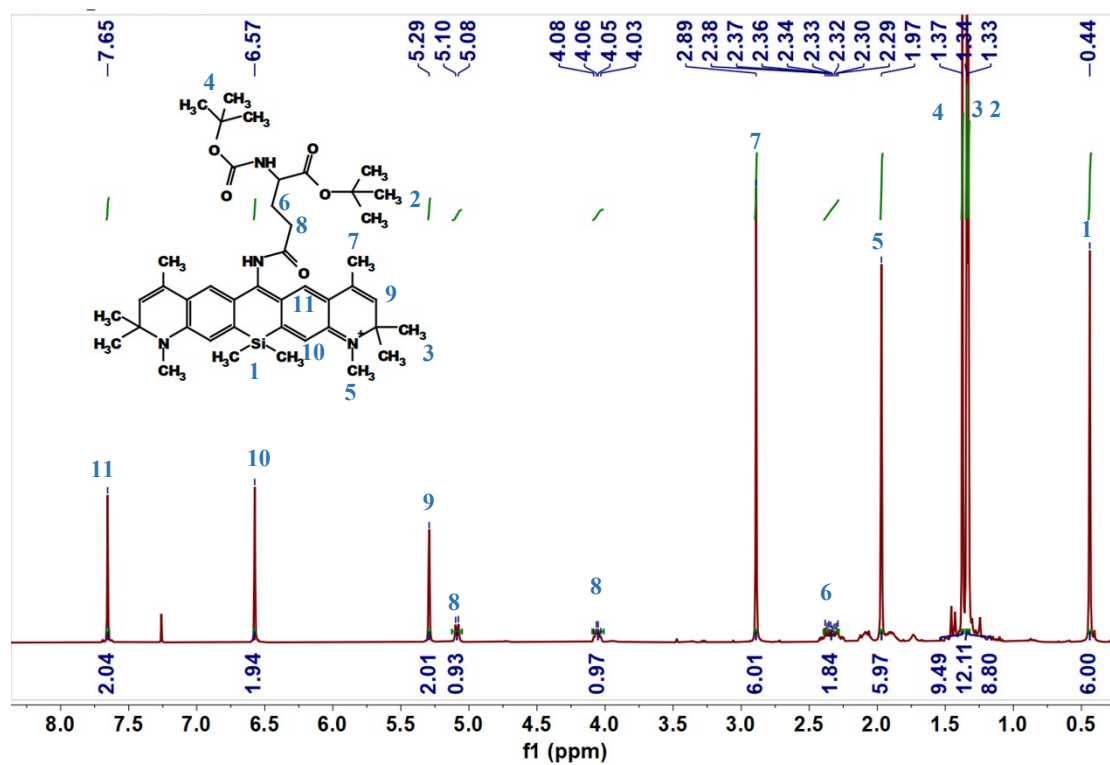

<sup>1</sup>H NMR of compound 8 in CDCl<sub>3</sub>

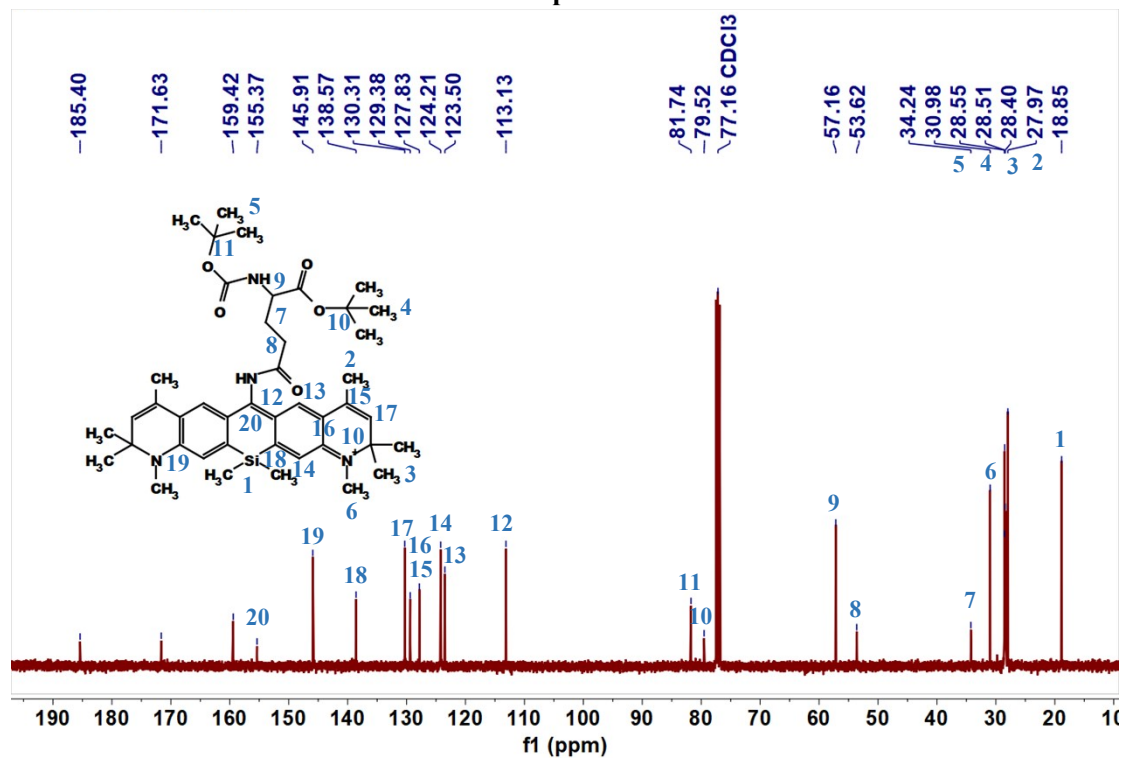

<sup>13</sup>C NMR of compound 8 in CDCl<sub>3</sub>



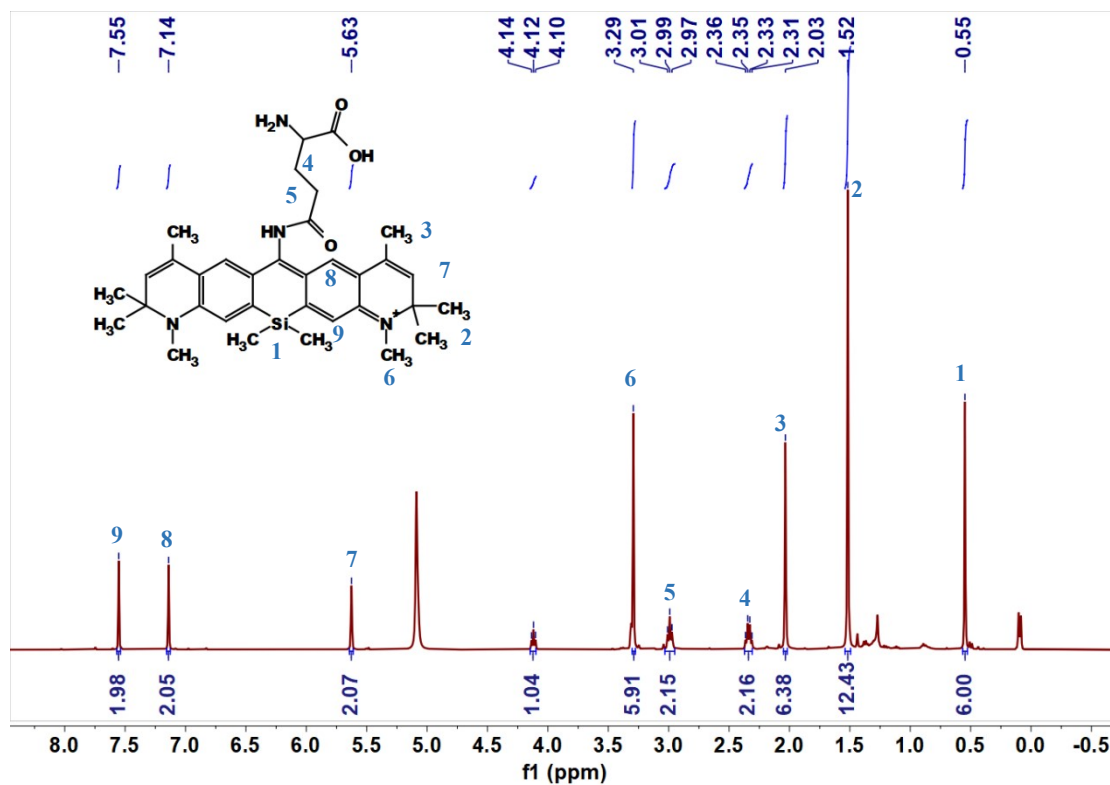

<sup>1</sup>H NMR of Si-NH<sub>2</sub>-Glu in CD<sub>3</sub>OD

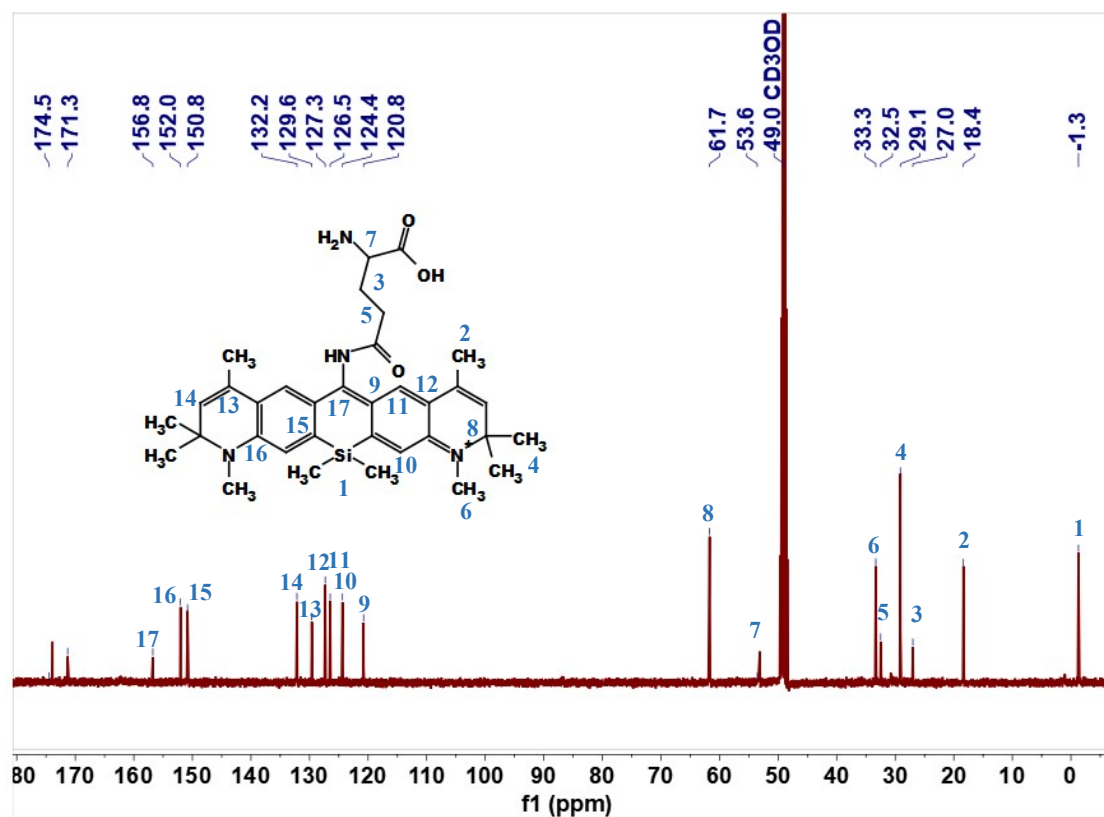

<sup>13</sup>C NMR of Si-NH<sub>2</sub>-Glu in CD<sub>3</sub>OD

## 14. ESI-MS Data

### Compound 6

ESI+

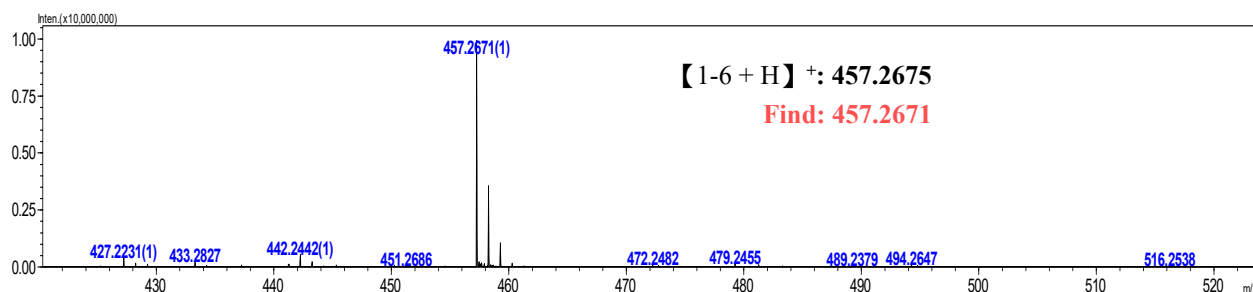

Si-NH<sub>2</sub>

ESI+

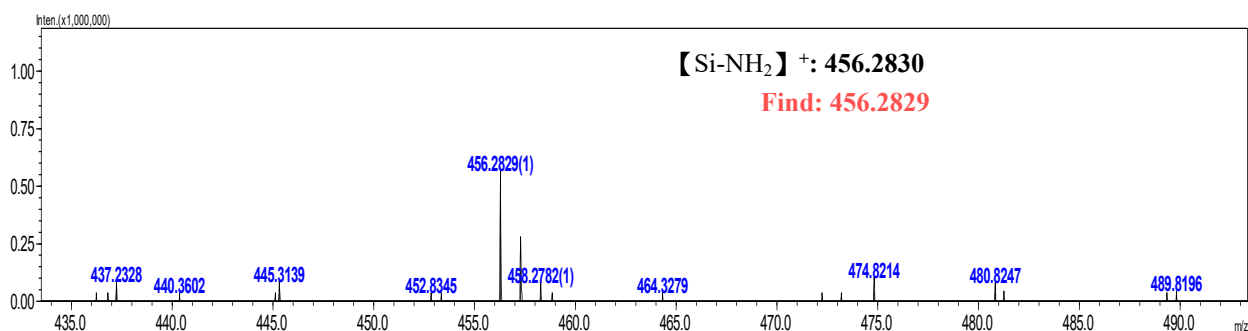

SI-NH<sub>2</sub>-Glu

ESI+

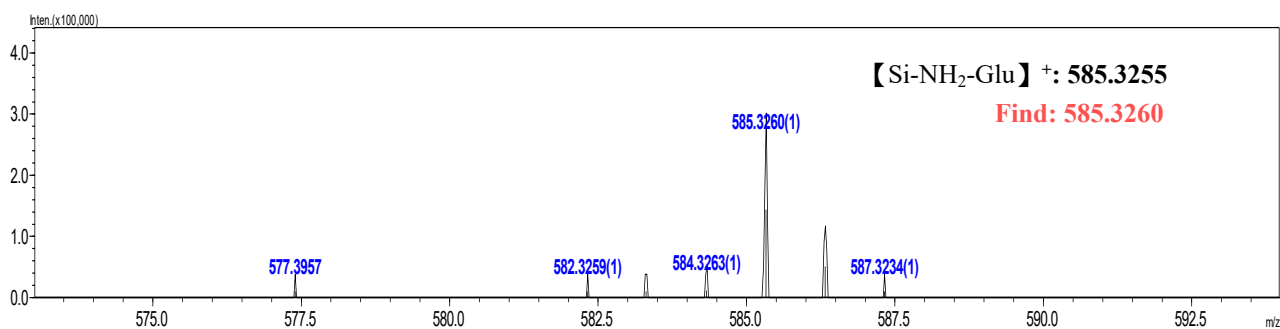

- 1 Y. Koide, Y. Urano, K. Hanaoka, W. Piao, M. Kusakabe, N. Saito, et al., Development of NIR Fluorescent Dyes Based on Si-rhodamine for in Vivo Imaging, *J.Am.Chem.Soc.*, 2012, **134**, 5029- 50312
- 2 T. Lu and F. J. Comput. Chem, 2012, **33**, 580-592.
- 3 Z. Liu, T. Lu and Q. Chen, *Carbon*, 2020, **165**, 461-467.
- 4 X.-Y. Ran, P. Chen, Y.-Z. Liu, L. Shi, X. Chen, Y.-H. Liu, H. Zhang, L.-N. Zhang, K. Li and X. Q. Yu, *Adv. Mater* (2023). DOI: 10.1002/adma.202210179.
